# Supplementary material for: The Value of Fetal Heart Evaluation in Fetuses with Rare Congenital Lymphangiomas: A Cohort Study from a Single Tertiary Center across Two Decades (Years 1999–2020)
Source: MDPI journal article supplement (doi:10.3390/jcm11041035), 2022-02-16
Supplement: s1 [file jcm-1574724-supplementary.pdf › jcm-1574724-supplementary.pdf]

Supplementary materials

# The value of fetal heart evaluation in lymphangioma - rare congenital malformation - in 32 cases from the tertiary center (1999-2020 years)

Paulina Kordjalik *et al.*

**Supplementary Table S1.** The outcomes of fetuses with lymphangioma based on the localization, CHD, and karyotype.

| #                                            | Follow-up                | Locations on the body                                  | NHA | CHD                                   | Additional information | Karyotype | Maternal residency in Poland |
|----------------------------------------------|--------------------------|--------------------------------------------------------|-----|---------------------------------------|------------------------|-----------|------------------------------|
| <b>Normal karyotype (n=9)</b>                |                          |                                                        |     |                                       |                        |           |                              |
| 1.                                           | Termination of pregnancy | Left side: cheek, armpit, arm, forearm, behind the ear | +   |                                       |                        | 46,XX     | Łódź                         |
| 2.                                           | Miscarriage              | Head, torso, upper limbs, lower limbs                  | -   | DORV, TGA, P <sub>v</sub> hypoplasia  |                        | 46,XX     | Inowrocław                   |
| 3.                                           | Termination of pregnancy | Head, neck, chest                                      | -   | DORV, PE                              |                        | 46,XX     | Zielona Góra                 |
| 4.                                           | Termination of pregnancy | Nape                                                   | +   |                                       |                        | 46,XX     | Łódź                         |
| 5.                                           | Termination of pregnancy | Nape                                                   | +   |                                       |                        | 46,XX     | Łódź                         |
| 6.                                           | Death after birth        | Neck                                                   | -   |                                       | Myocarditis            | 46,XY     | No data                      |
| 7.                                           | Death after birth        | Neck                                                   | +   |                                       |                        | 46,XY     | Radomsko                     |
| 8.                                           | Alive                    | Nape, neck                                             | -   | VSD, PE                               |                        | 46,XX     | Łódź                         |
| 9.                                           | Alive                    | Nape                                                   | +   |                                       |                        | 46,XY     | Włocławek                    |
| <b>Abnormal karyotype (n=6)</b>              |                          |                                                        |     |                                       |                        |           |                              |
| 1.                                           | Miscarriage              | Neck, nape                                             | -   |                                       | SVT                    | 45,X      | Voivodeship łódzkie          |
| 2.                                           | Miscarriage              | Neck                                                   | -   | AVSD, HAA                             |                        | 45,X      | Bydgoszcz                    |
| 3.                                           | Termination of pregnancy | Neck                                                   | -   | AVSD, DORV, TOF, VSD                  |                        | 46,XY+21  | Płock                        |
| 4.                                           | Miscarriage              | Head, torso, limbs                                     | -   | AVSD, DAA                             |                        | 45,X      | ND                           |
| 5.                                           | Alive                    | Nape                                                   | -   | AVSD, DORV, P <sub>v</sub> S, PE      |                        | 46,XY+21  | Poznań                       |
| 6.                                           | Alive                    | Nape                                                   | +   |                                       |                        | 45,X      | ND                           |
| <b>No data according to karyotype (n=17)</b> |                          |                                                        |     |                                       |                        |           |                              |
| 1.                                           | Miscarriage              | Nape                                                   | -   | AVSD, A-V v insuff., DV reversal flow |                        | ND        | ND                           |
| 2.                                           | Miscarriage              | Neck, nape                                             | -   |                                       | SVT                    | ND        | Voivodeship łódzkie          |
| 3.                                           | Miscarriage              | Nape                                                   | +   |                                       |                        | ND        | Voivodeship łódzkie          |

|     |                   |                                               |   |                                                 |                         |           |
|-----|-------------------|-----------------------------------------------|---|-------------------------------------------------|-------------------------|-----------|
| 4.  | Death after birth | Nape                                          | + |                                                 | ND                      | ND        |
| 5.  | Death in utero    | Neck                                          | - | Ebstein s., Pv hypoplasia, TR, MR, Cardiomegaly | ND                      | Rzeszów   |
| 6.  | Miscarriage       | Nape                                          | - | CHD +                                           | ND                      | Bełchatów |
| 7.  | Death in utero    | Neck, nape                                    | - | TGA, PA, TR                                     | ND                      | ND        |
| 8.  | Miscarriage       | Neck, nape, torso                             | - | AVSD                                            | ND                      | ND        |
| 9.  | Miscarriage       | Nape, neck, torso                             | - |                                                 | Heart beyond assessment | ND        |
| 10. | Death in utero    | Nape                                          | - | AVSD, CCHB, Cardiomegaly, TR                    | ND                      | ND        |
| 11. | Miscarriage       | Nape                                          | + |                                                 | ND                      | Kielce    |
| 12. | Death after birth | Neck, from the back of the head to the sacrum | - |                                                 | CHF                     | ND        |
| 13. | Death after birth | Head, nape                                    | + |                                                 | ND                      | ND        |
| 14. | Alive             | Torso                                         | + |                                                 | ND                      | Wrocław   |
| 15. | Miscarriage       | Nape                                          | + |                                                 | ND                      | ND        |
| 16. | Alive             | Nape                                          | + |                                                 | ND                      | ND        |
| 17. | Alive             | Nape                                          | + |                                                 | ND                      | ND        |

**Legend:** A-V insuff.- Atrial-ventricular insufficiency, AVSD-atrioventricular septal defect, CCHB-complete congenital heart block, CHD-congenital heart defect, CHF-congenital heart failure, DAA-double aortic arch, DORV-double outlet right ventricle, DV-ductus venosus, Ebstein s.-Ebstein syndrome, HAA-aortic arch hypoplasia, MR-mitral regurgitation, NHA-normal heart anatomy, PA-pulmonary atresia, PE-pericardial effusion, PvH-pulmonary valve hypoplasia, Pvhypopl.-pulmonary valve hypoplasia, PvS-pulmonary valve stenosis, SVT-supraventricular tachycardia, TGA-transposition of great artery, TOF-tetralogy of Fallot, TOP-termination of pregnancy, TR-tricuspid regurgitation, VSD-ventricular septal defect.
